# Supplementary material
Source: MDPI journal article supplement (https://www.mdpi.com/2072-4292/12/11/1722)
Supplement: s1 [file s1]

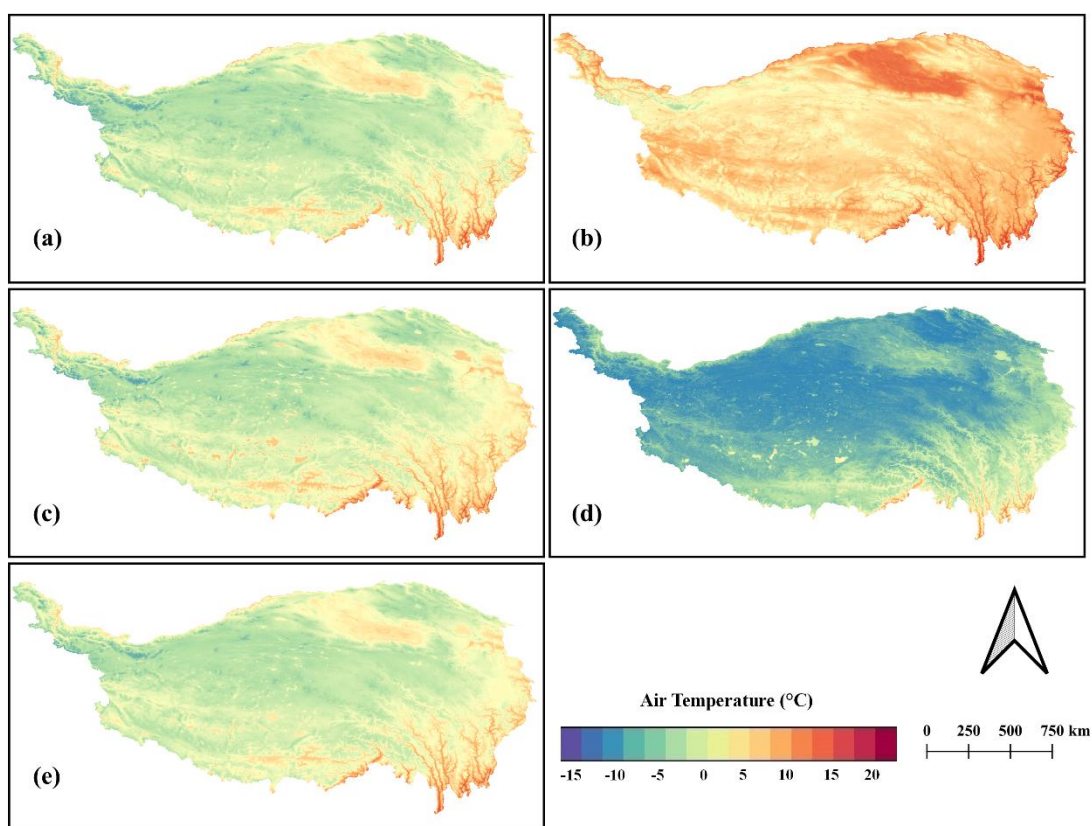

**Figure S1.** Spatial distribution of the seasonally averaged daily mean air temperatures for 2003–2013 in spring (a), summer (b), autumn (c), winter (d) and the full year (e).

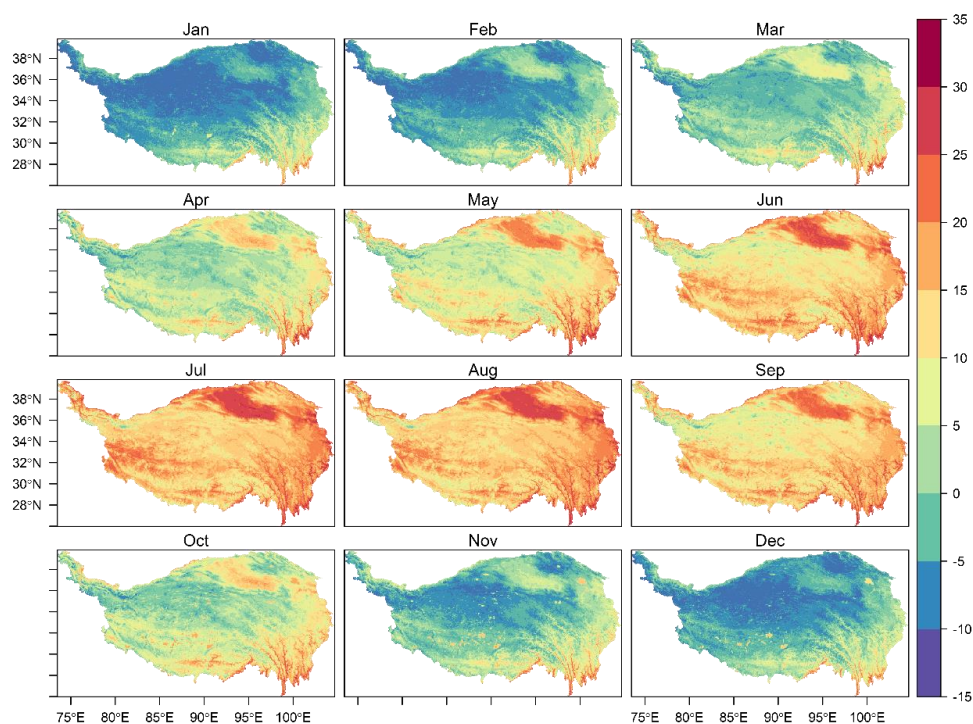

**Figure S2.** Monthly Maximum temperature derived from RF between 2003 and 2013.

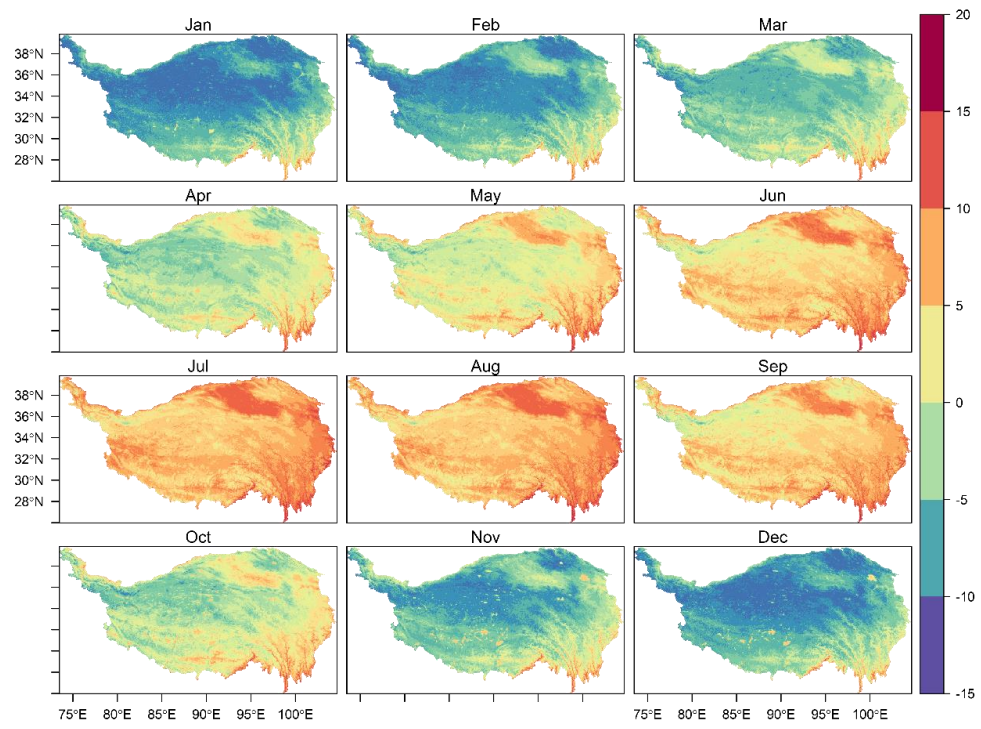

**Figure S3.** Monthly Minimum temperature derived from RF between 2003 and 2013.
